# Supplementary material for: Transcriptome analysis of rice root responses to potassium deficiency
Source: PubMed Central journal article supplement (PMC3489729; doi:10.1186/1471-2229-12-161), 2012-09-10
Supplement: 1471-2229-12-161-S1.pdf [file 1471-2229-12-161-S1.pdf]

| Array Name     | CK-6h-1 | CK-6h-2 | CK-6h-3 | LK-6h-1 | LK-6h-2 | LK-6h-3 | CK-3d-1 | CK-3d-2 | CK-3d-3 | LK-3d-1 | LK-3d-2 | LK-3d-3 | CK-5d-1 | CK-5d-2 | CK-5d-3 | LK-5d-1 | LK-5d-2 | LK-5d-3 |
|----------------|---------|---------|---------|---------|---------|---------|---------|---------|---------|---------|---------|---------|---------|---------|---------|---------|---------|---------|
| <b>CK-6h-1</b> | 1.0000  |         |         |         |         |         |         |         |         |         |         |         |         |         |         |         |         |         |
| <b>CK-6h-2</b> | 0.9933  | 1.0000  |         |         |         |         |         |         |         |         |         |         |         |         |         |         |         |         |
| <b>CK-6h-3</b> | 0.9933  | 0.9977  | 1.0000  |         |         |         |         |         |         |         |         |         |         |         |         |         |         |         |
| <b>LK-6h-1</b> | 0.9957  | 0.9954  | 0.9953  | 1.0000  |         |         |         |         |         |         |         |         |         |         |         |         |         |         |
| <b>LK-6h-2</b> | 0.9887  | 0.9950  | 0.9942  | 0.9915  | 1.0000  |         |         |         |         |         |         |         |         |         |         |         |         |         |
| <b>LK-6h-3</b> | 0.9901  | 0.9970  | 0.9958  | 0.9948  | 0.9963  | 1.0000  |         |         |         |         |         |         |         |         |         |         |         |         |
| <b>CK-3d-1</b> | 0.9885  | 0.9857  | 0.9870  | 0.9867  | 0.9826  | 0.9838  | 1.0000  |         |         |         |         |         |         |         |         |         |         |         |
| <b>CK-3d-2</b> | 0.9874  | 0.9902  | 0.9901  | 0.9872  | 0.9896  | 0.9892  | 0.9955  | 1.0000  |         |         |         |         |         |         |         |         |         |         |
| <b>CK-3d-3</b> | 0.9842  | 0.9892  | 0.9890  | 0.9847  | 0.9886  | 0.9893  | 0.9932  | 0.9982  | 1.0000  |         |         |         |         |         |         |         |         |         |
| <b>LK-3d-1</b> | 0.9780  | 0.9785  | 0.9782  | 0.9793  | 0.9763  | 0.9793  | 0.9882  | 0.9884  | 0.9877  | 1.0000  |         |         |         |         |         |         |         |         |
| <b>LK-3d-2</b> | 0.9727  | 0.9807  | 0.9801  | 0.9771  | 0.9791  | 0.9828  | 0.9840  | 0.9880  | 0.9889  | 0.9949  | 1.0000  |         |         |         |         |         |         |         |
| <b>LK-3d-3</b> | 0.9726  | 0.9777  | 0.9783  | 0.9745  | 0.9802  | 0.9805  | 0.9847  | 0.9896  | 0.9897  | 0.9944  | 0.9962  | 1.0000  |         |         |         |         |         |         |
| <b>CK-5d-1</b> | 0.9875  | 0.9889  | 0.9880  | 0.9884  | 0.9856  | 0.9873  | 0.9923  | 0.9941  | 0.9921  | 0.9863  | 0.9850  | 0.9826  | 1.0000  |         |         |         |         |         |
| <b>CK-5d-2</b> | 0.9845  | 0.9897  | 0.9878  | 0.9857  | 0.9890  | 0.9888  | 0.9889  | 0.9939  | 0.9927  | 0.9831  | 0.9848  | 0.9822  | 0.9967  | 1.0000  |         |         |         |         |
| <b>CK-5d-3</b> | 0.9844  | 0.9877  | 0.9885  | 0.9842  | 0.9889  | 0.9873  | 0.9919  | 0.9958  | 0.9948  | 0.9839  | 0.9852  | 0.9870  | 0.9947  | 0.9963  | 1.0000  |         |         |         |
| <b>LK-5d-1</b> | 0.9722  | 0.9730  | 0.9727  | 0.9735  | 0.9727  | 0.9733  | 0.9801  | 0.9818  | 0.9802  | 0.9911  | 0.9906  | 0.9899  | 0.9835  | 0.9818  | 0.9835  | 1.0000  |         |         |
| <b>LK-5d-2</b> | 0.9703  | 0.9764  | 0.9750  | 0.9732  | 0.9753  | 0.9779  | 0.9780  | 0.9820  | 0.9817  | 0.9900  | 0.9933  | 0.9907  | 0.9836  | 0.9847  | 0.9843  | 0.9965  | 1.0000  |         |
| <b>LK-5d-3</b> | 0.9628  | 0.9730  | 0.9706  | 0.9663  | 0.9749  | 0.9753  | 0.9719  | 0.9792  | 0.9797  | 0.9851  | 0.9924  | 0.9903  | 0.9789  | 0.9814  | 0.9807  | 0.9924  | 0.9965  | 1.0000  |
