# Supplementary material for: Transcriptome analysis of rice root responses to potassium deficiency
Source: PubMed Central journal article supplement (PMC3489729; doi:10.1186/1471-2229-12-161), 2012-09-10
Supplement: 1471-2229-12-161-S2.pdf [file 1471-2229-12-161-S2.pdf]

| <b>Probe sets<br/>expressed in</b> | <b>No.of<br/>Probe sets</b> | <b>Percentage in rice array<br/>(57,194 probe sets)</b> |
|------------------------------------|-----------------------------|---------------------------------------------------------|
| CK-6 h                             | 24,768                      | 43.3                                                    |
| LK-6 h                             | 25,403                      | 44.4                                                    |
| CK-3 d                             | 24,192                      | 42.3                                                    |
| LK-3 d                             | 24,508                      | 42.9                                                    |
| CK-5 d                             | 25,051                      | 43.8                                                    |
| LK-5 d                             | 25,392                      | 44.4                                                    |
