# Supplementary material for: Transcriptome analysis of rice root responses to potassium deficiency
Source: PubMed Central journal article supplement (PMC3489729; doi:10.1186/1471-2229-12-161), 2012-09-10

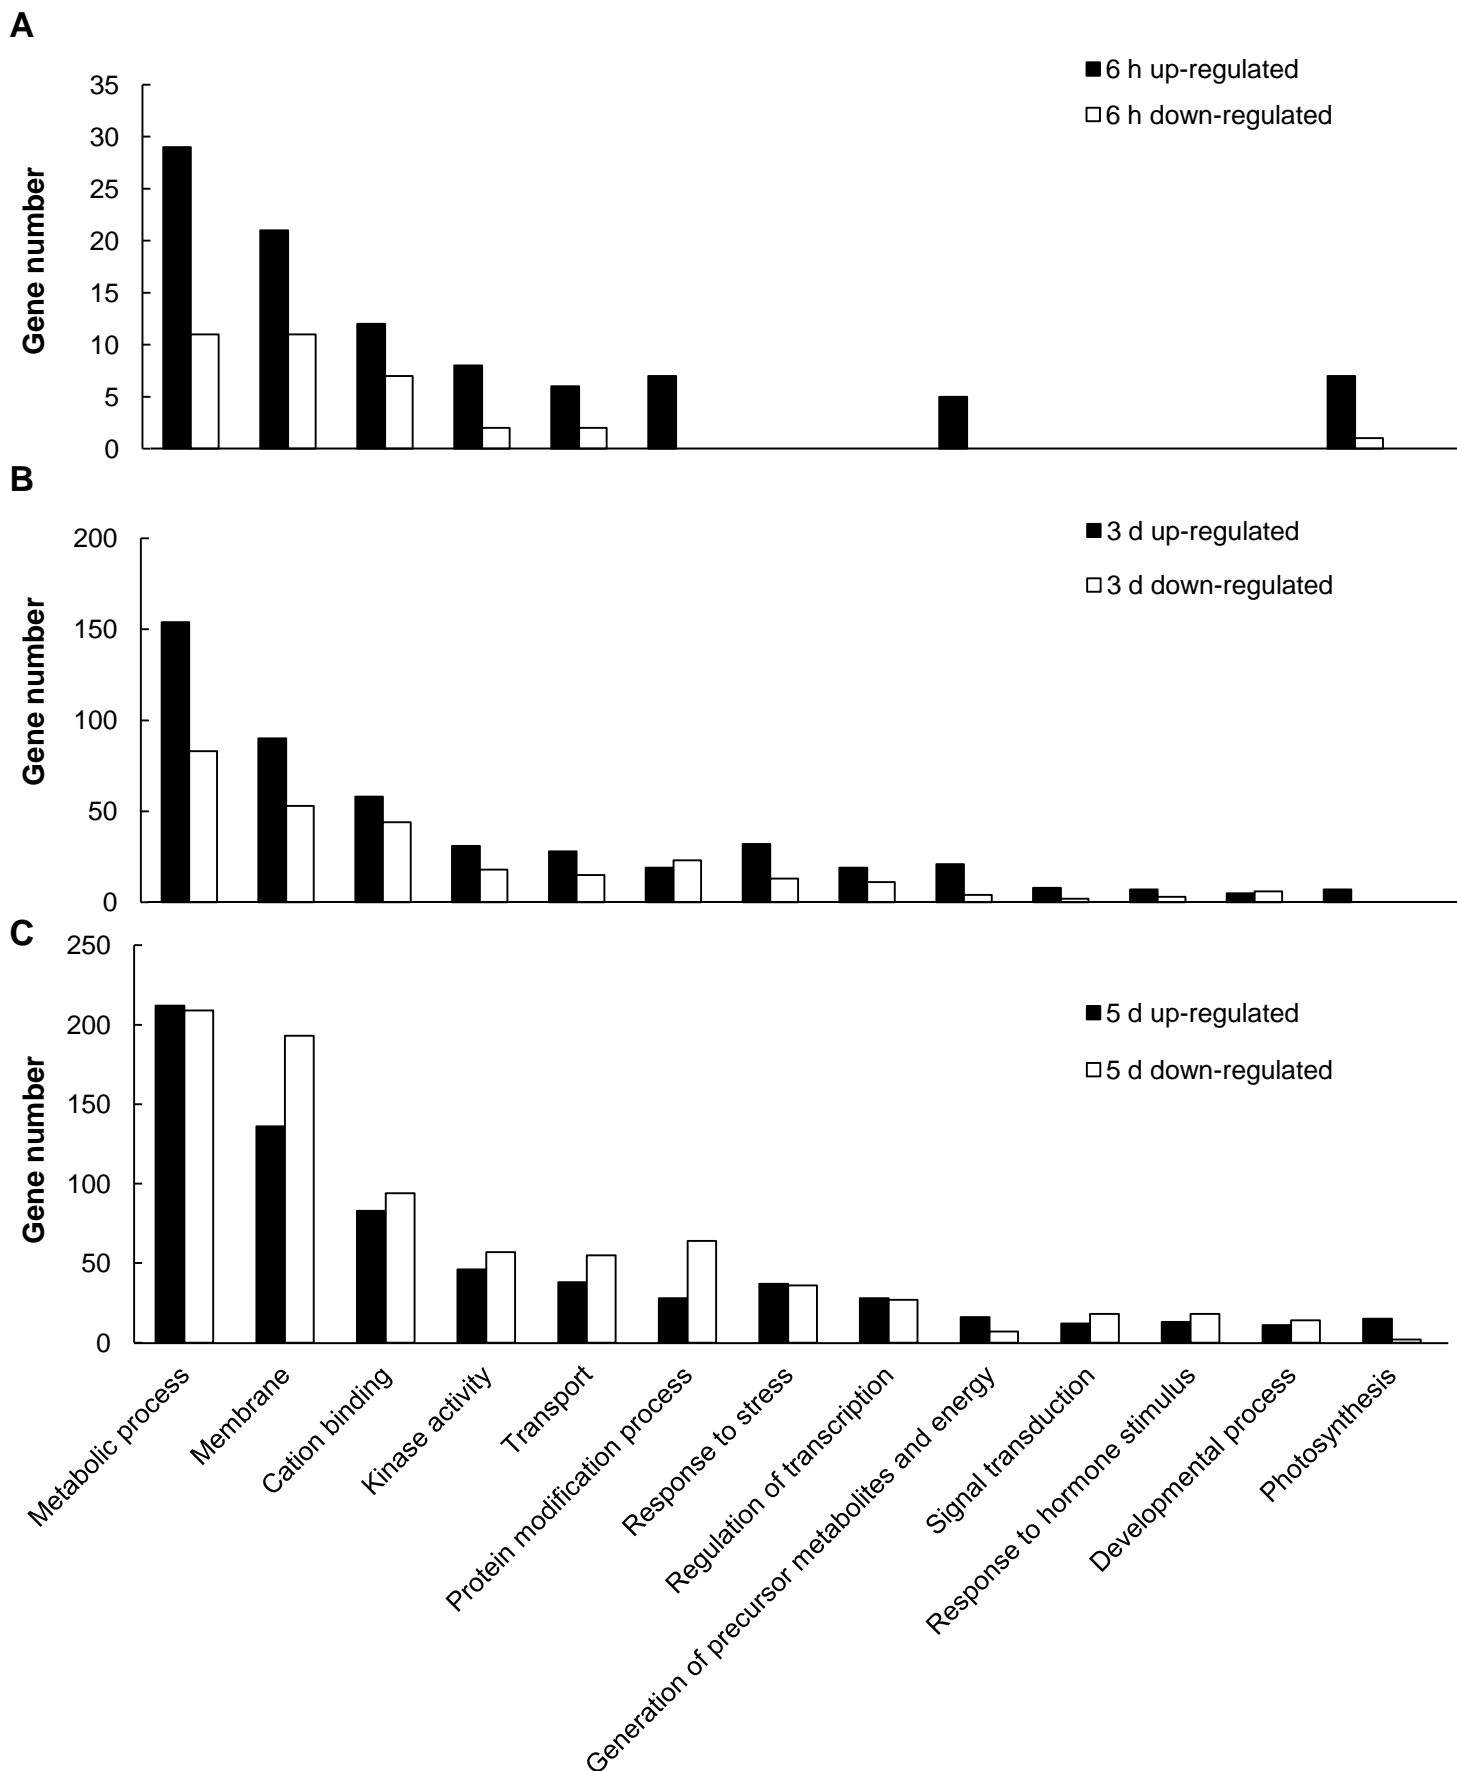

Supplement: 1471-2229-12-161-S4.pdf [file 1471-2229-12-161-S4.pdf]
