# Supplementary material for: Transcriptome analysis of rice root responses to potassium deficiency
Source: PubMed Central journal article supplement (PMC3489729; doi:10.1186/1471-2229-12-161), 2012-09-10
Supplement: 1471-2229-12-161-S9.pdf [file 1471-2229-12-161-S9.pdf]

| <b>Analysis methods</b>                                                       | <b>Culture methods</b>                                                                                                                                  | <b>No. of genes</b> | <b>Percentage in genome</b> | <b>Reference</b>       |
|-------------------------------------------------------------------------------|---------------------------------------------------------------------------------------------------------------------------------------------------------|---------------------|-----------------------------|------------------------|
| Rank product statistics and iterative group analysis (FDR% < 1), Roots, n = 3 | <i>Arabidopsis</i> seedlings grown on K <sup>+</sup> -free medium in petri dishes for two weeks after germination.                                      | 299                 | 1.25                        | Armengaud et al., 2004 |
| Fold Change ≥ 2 and <i>P</i> -value ≤ 0.04, Roots, n = 1                      | <i>Arabidopsis</i> root response to low K <sup>+</sup> stress in the treatment time points of 2 d and 4 d under K <sup>+</sup> -free hydroponic medium. | 391                 | 1.63                        | Gierth et al., 2005    |
| Fold Change ≥ 2 and <i>P</i> -value ≤ 0.05, Roots, n = 3                      | Rice root response to low K <sup>+</sup> stress in the treatment time points of 6 h, 3 d and 5 d under K <sup>+</sup> -free hydroponic medium.          | 356                 | 0.71                        | Present data           |
