# Supplementary material for: Transcriptome analysis of rice root responses to potassium deficiency
Source: PubMed Central journal article supplement (PMC3489729; doi:10.1186/1471-2229-12-161), 2012-09-10
Supplement: 1471-2229-12-161-S12.pdf [file 1471-2229-12-161-S12.pdf]

| <b>Probe ID<br/>(Gene ID)</b>        | <b>Forward and reverse primers</b>                         | <b>Aonotation</b>                                                |
|--------------------------------------|------------------------------------------------------------|------------------------------------------------------------------|
| Os.2617.2.S1_a_at<br>(Os06g0701700)  | 5'-TCTGACACTTTCCAGCCTCA-3'<br>5'-TGCTTGCCGAGTTGATTGTA-3'   | OsHKT2;1                                                         |
| Os.23476.1.A1_at<br>(Os01g0598200)   | 5'-TTGACCAGGCTGACACAAAA-3'<br>5'-GCAACACCAGGTTTCAGGTT-3'   | OsCBL5                                                           |
| Os.55509.1.S1_at<br>(Os08g0441100)   | 5'-CAACATCGTCACCCTGTACC-3'<br>5'-CGGAGGAAGCTCTATGCTCA-3'   | OsCIPK6                                                          |
| Os.56004.1.S1_at<br>(Os03g0347500)   | 5'-TGAATCGCATGCATCTTAGC-3'<br>5'-CACGTGTCCCAATCATACA-3'    | OsSWEET12                                                        |
| Os.53403.1.S1_s_at<br>(Os08g0508700) | 5'-CGTTTGATGGATTGCCTTTT-3'<br>5'-CGCCCTTCTCAAGTTCTCAG-3'   | Ethylene-insensitive 3, putative, expressed                      |
| Os.53584.1.S1_at<br>(Os02g0237100)   | 5'-TGGGTCATGGCATCAGATTA-3'<br>5'-CTTGCATCATCCTCGGTGTA-3'   | Spermidine synthase, putative, expressed                         |
| Os.2245.1.S1_at<br>(Os05g0506000)    | 5'-CGAGCTAAGCAGCTTCTCCA-3'<br>5'-AACAAGCAATTTGGTCCCTTA-3'  | Tetratricopeptide repeat, domain containing protein              |
| Os.9739.1.S1_at<br>(Os04g0142400)    | 5'-GCCTCGATGAGGAAAACAAG-3'<br>5'-CACATTACCGTGGTGACGAA-3'   | Expressed protein                                                |
| Os.47802.1.A1_at<br>(Os12g0555000)   | 5'-ATTCATCGCGTGCATGATAA-3'<br>5'-AAATGATCTCACCAACTGAAAA-3' | Pathogenesis-related Bet v I family protein, putative, expressed |

|                                          |                                                           |                                                                         |
|------------------------------------------|-----------------------------------------------------------|-------------------------------------------------------------------------|
| Os.5242.1.S1_at<br>(Os01g0795000)        | 5'-GCATAACCTGGGCAAAACAT-3'<br>5'-AATTGACCATCCATCGAAGTG-3' | OsSub6-Putative Subtilisin homologue, expressed                         |
| OsAffx.24308.1.S1_s_at<br>(Os02g0286933) | 5'-GTTTGAGTGCTTGGTTCCCT-3'<br>5'-AGAAGAGATGGGTGAGGCAG-3'  | Uncharacterized cys-rich domain containing protein, putative, expressed |
| OsAffx.28867.2.S1_at<br>(Os07g0611500)   | 5'-CAACTGATGCCACATAACACA-3'<br>5'-GGCGAAGAAGGAGATGGTCT-3' | DC1 domain-containing protein, putative, expressed                      |

---
